# Supplementary figures and images for: Massive normalization of olfactory bulb output in mice with a 'monoclonal nose'
Source: eLife journal article supplement (doi:10.7554/elife.16335), 2016-05-13

Figure 6 - figure supplement 1

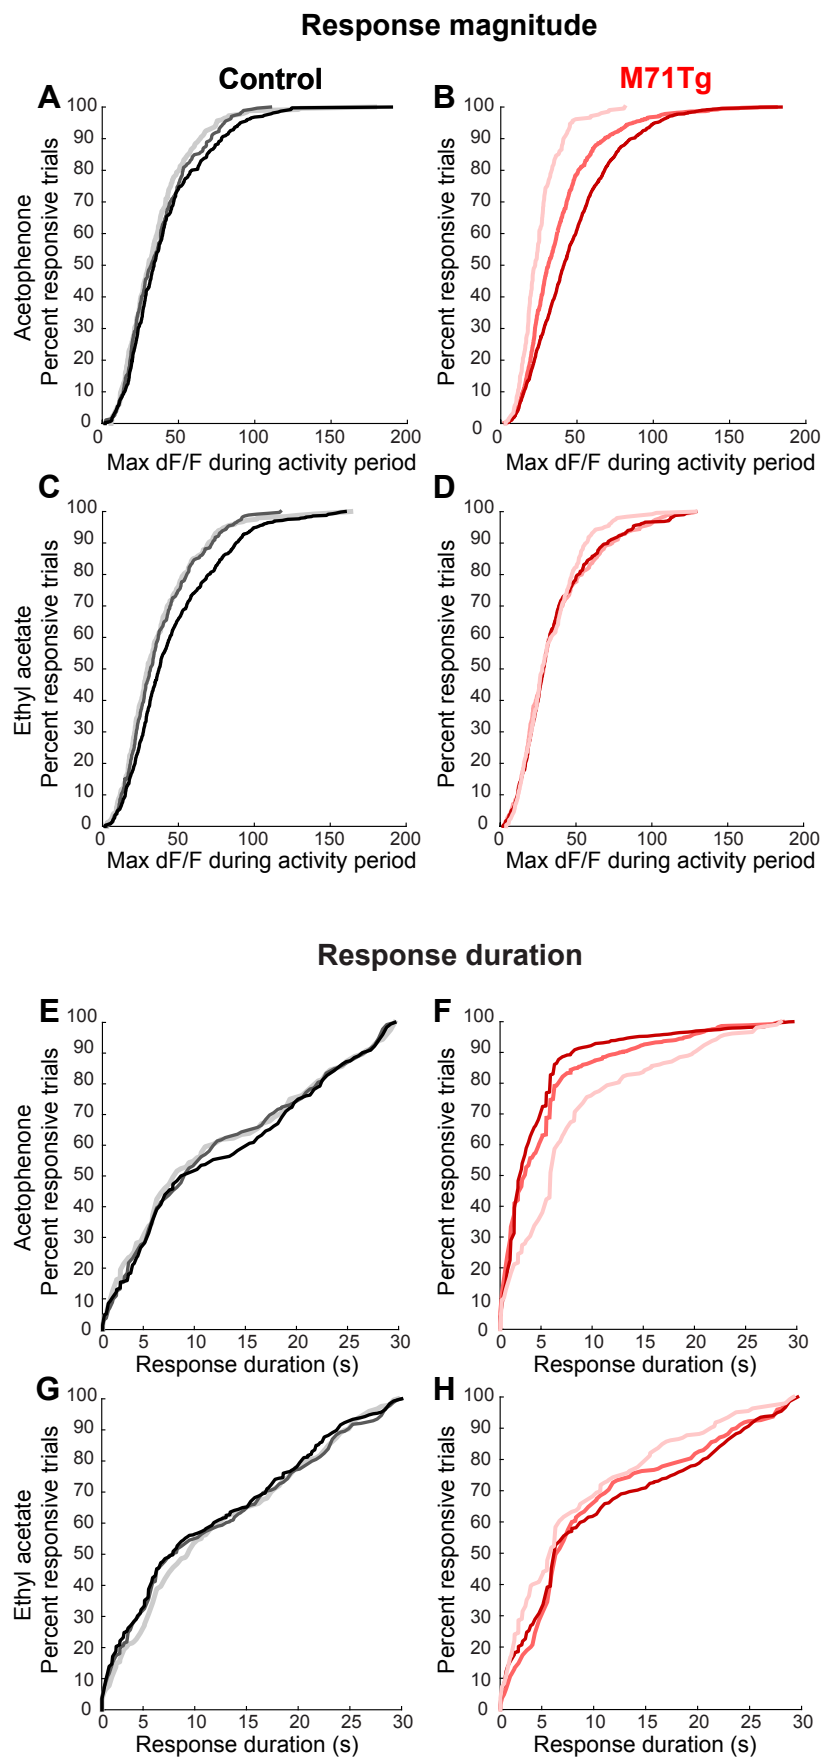

Supplement: supp [file elife-16335-supp-v1.zip]

Figure 5 - figure supplement 1

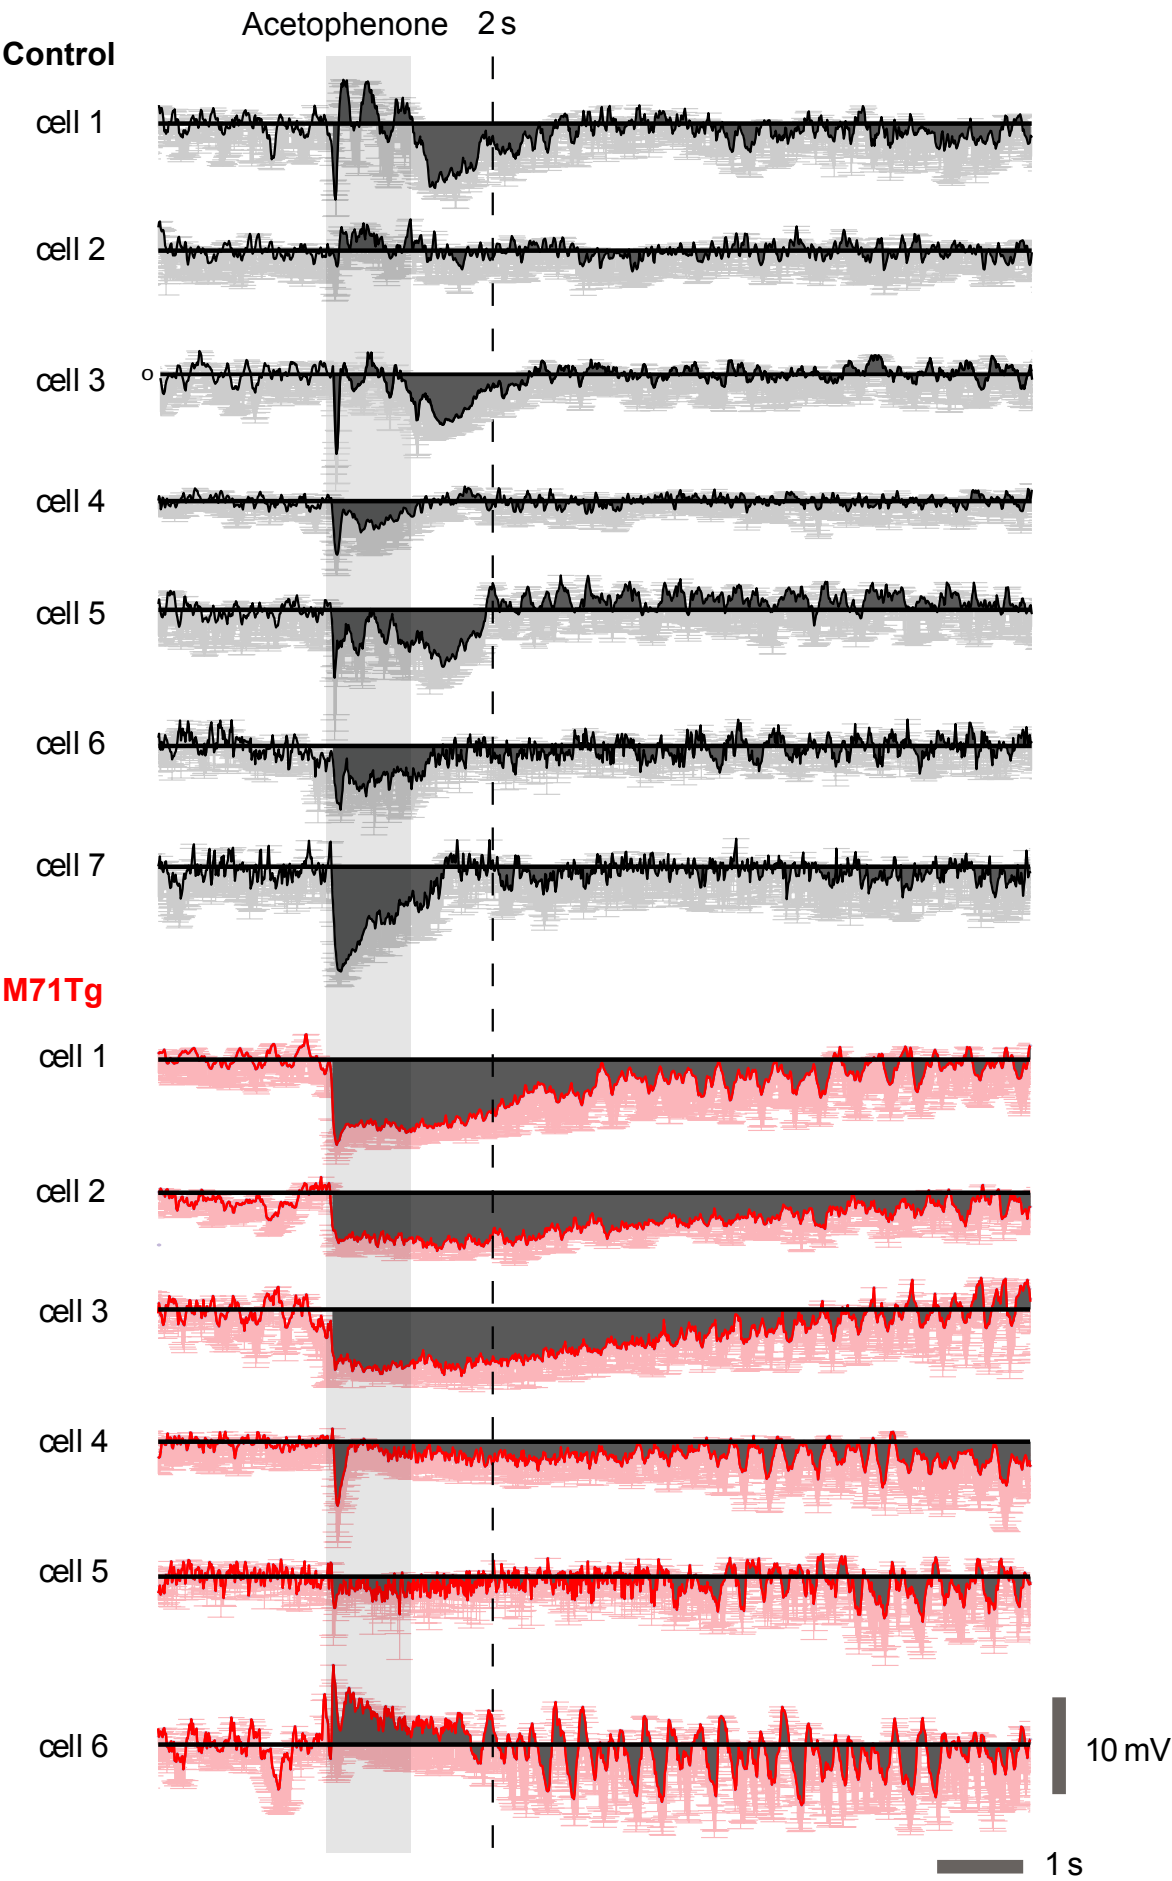

Supplement: supp [file elife-16335-supp-v1.zip]

Figure 3 - figure supplement 1

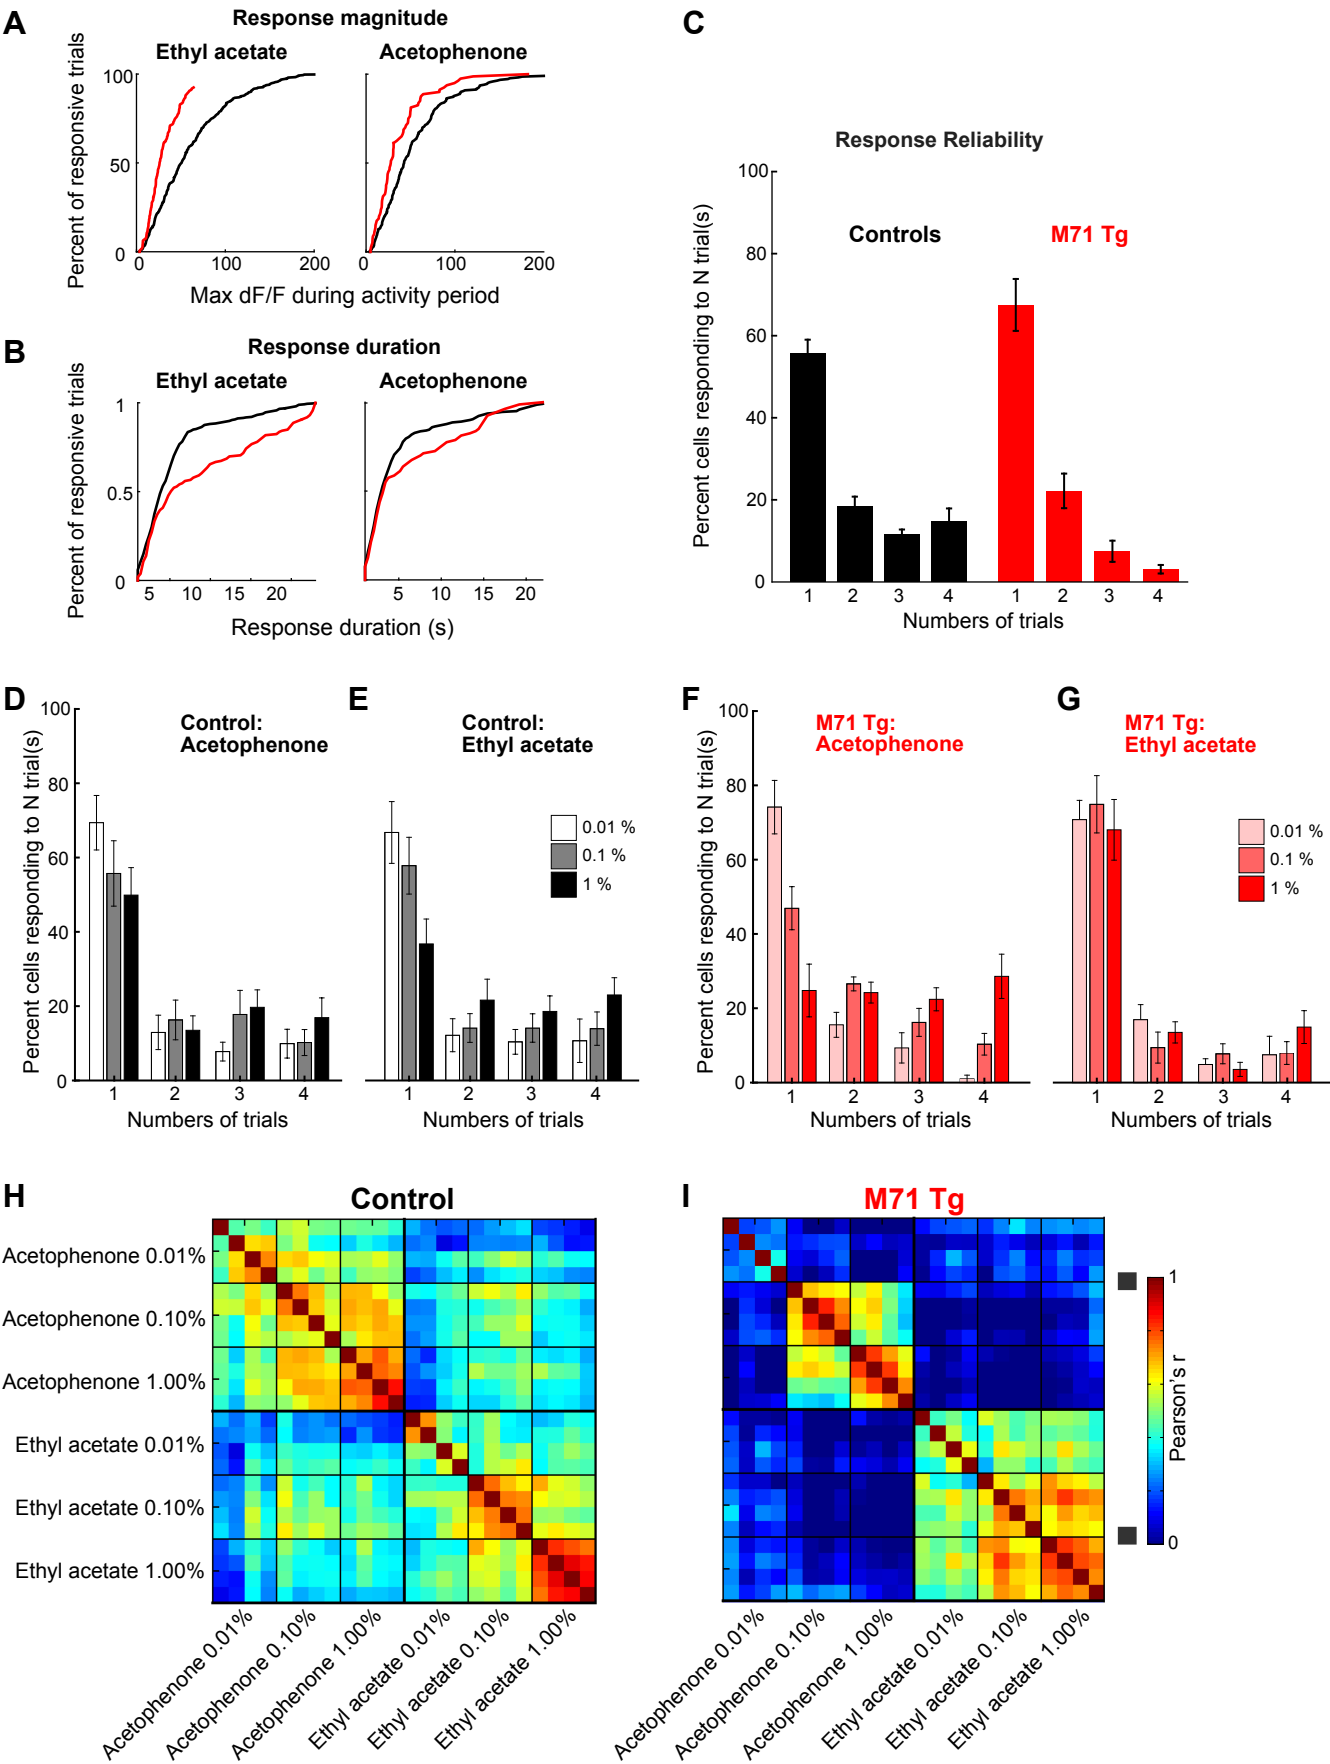

Supplement: supp [file elife-16335-supp-v1.zip]

Figure 1 - figure supplement 1

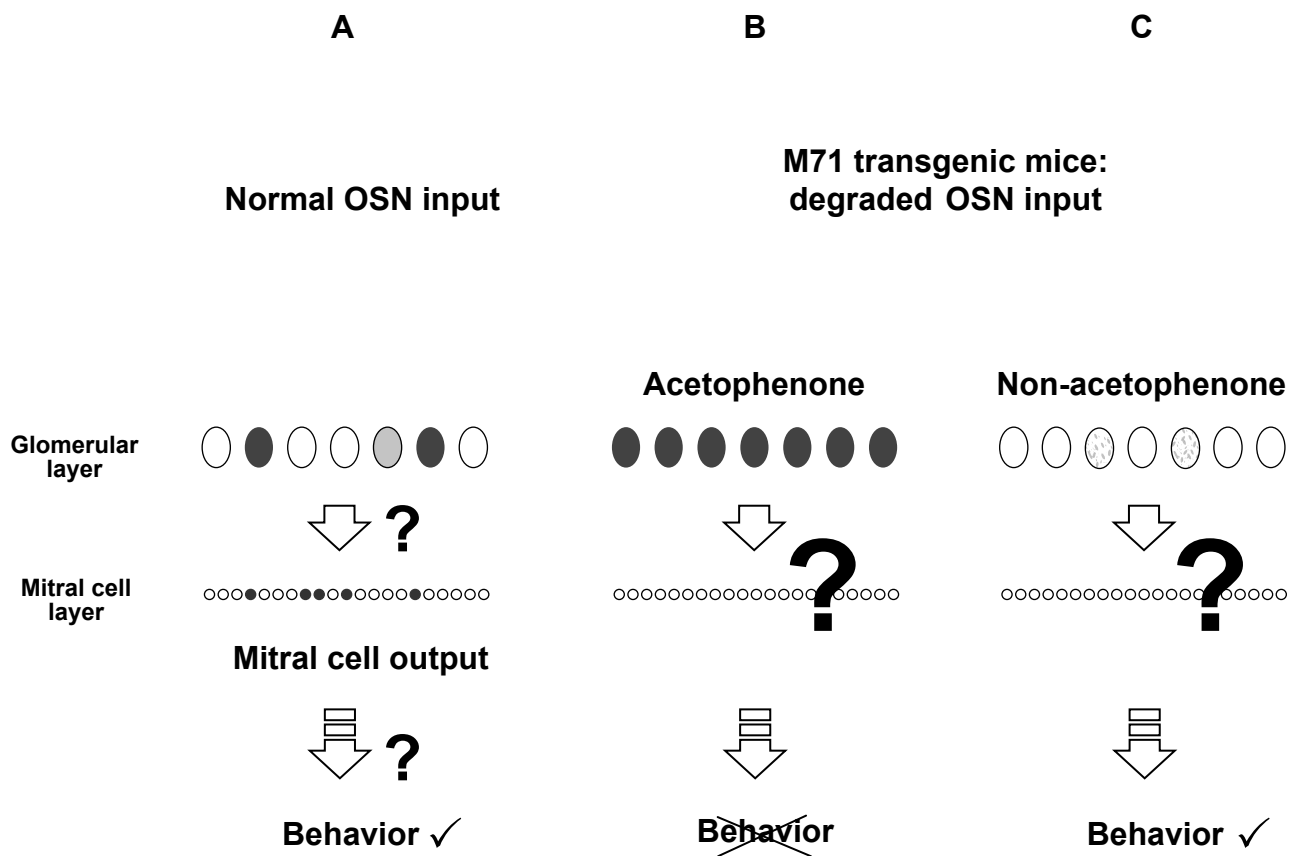

Supplement: supp [file elife-16335-supp-v1.zip]

Figure 4 - figure supplement 1

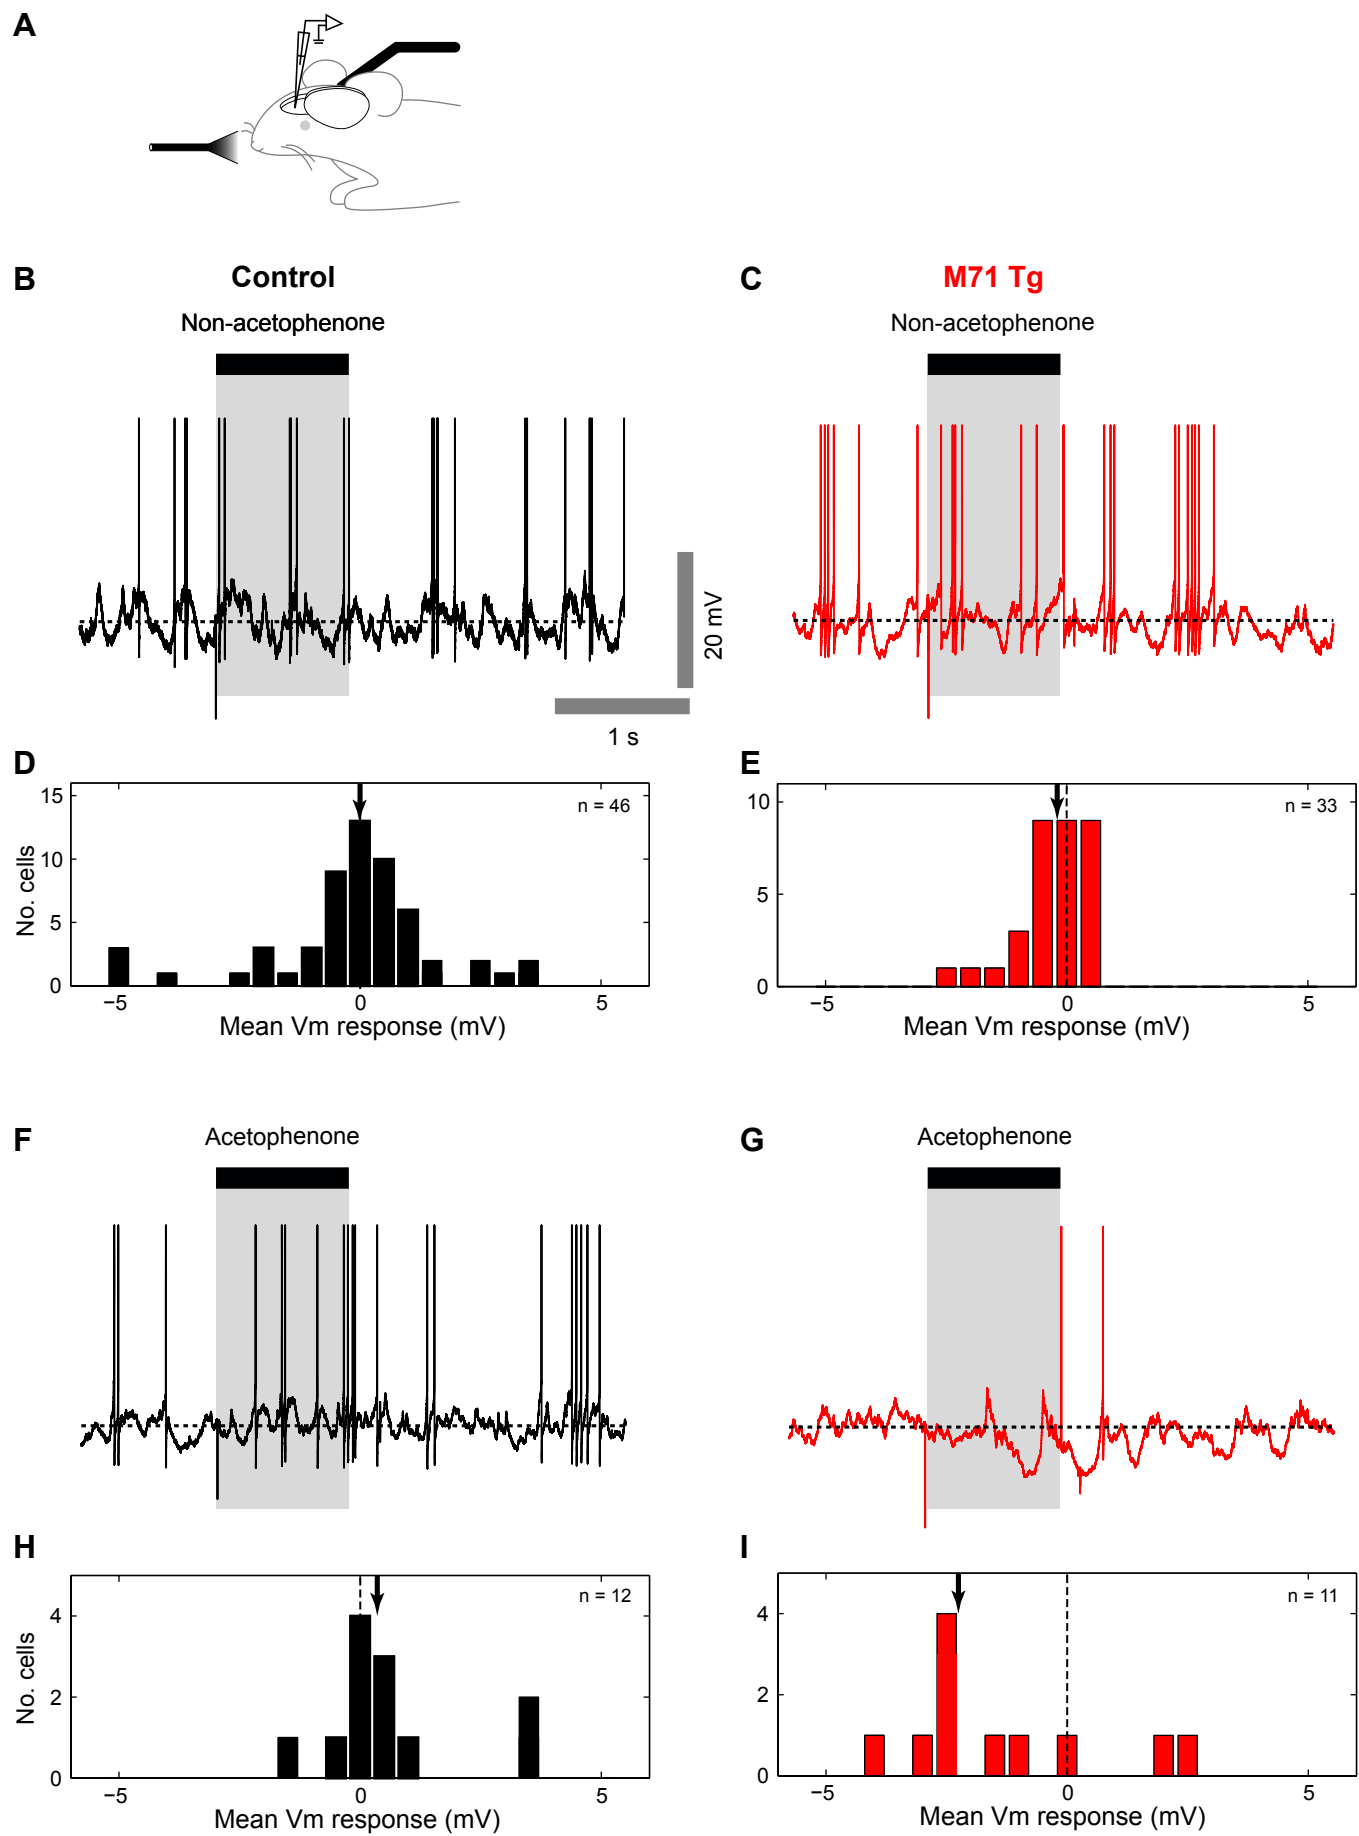

Supplement: supp [file elife-16335-supp-v1.zip]

Figure1- figure supplement 2

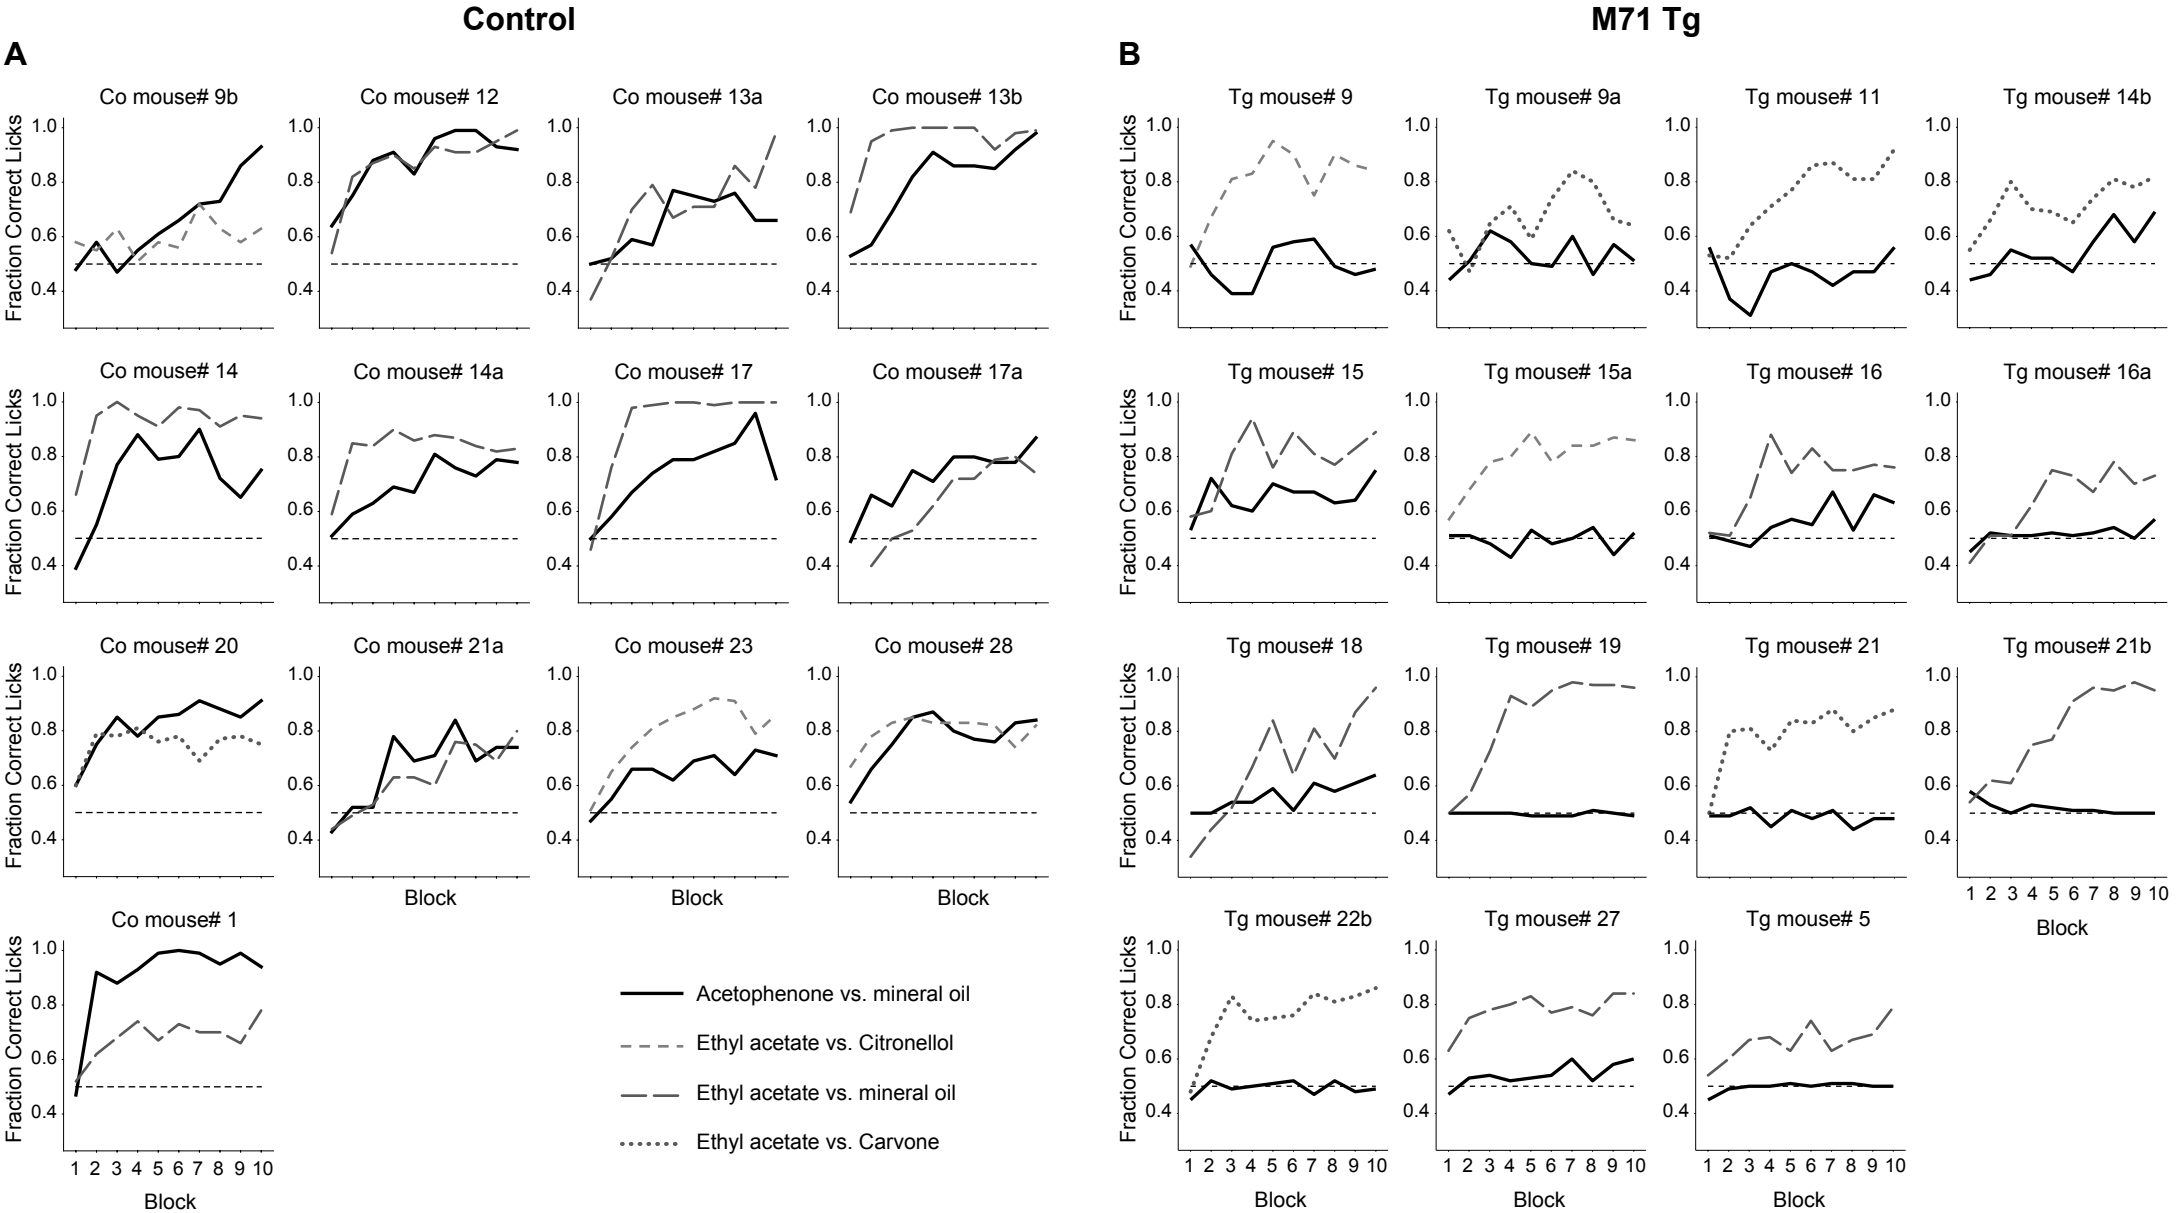

Supplement: supp [file elife-16335-supp-v1.zip]
